# Supplementary material for: The current epidemiological status of urogenital schistosomiasis among primary school pupils in Katsina State, Nigeria: An imperative for a scale up of water and sanitation initiative and mass administration of medicines with Praziquantel
Source: PubMed Central journal article supplement (PMC6051670; doi:10.1371/journal.pntd.0006636), 2018-07-06
Supplement: pntd.0006636.s002.pdf [file pntd.0006636.s002.pdf]

**URINARY SCHISTOSOMIASIS FORM A**

**(SCHOOL COMMUNITY-BASED QUESTIONNAIRE)**

State \_\_\_\_\_ LGA \_\_\_\_\_

School name \_\_\_\_\_

Population \_\_\_\_\_

Location of school \_\_\_\_\_

Have you ever received Praziquantel for distribution?    Yes [ ]                      No [ ]

If yes, was there a successful distribution of praziquantel?    Yes [ ]                      No [ ]

If no, why? \_\_\_\_\_

If yes, were there reported side effects?                      Yes [ ]                      No [ ]

Do you know any student in this school who reportedly pass blood-stained urine?

Yes [ ]                      No [ ]

What is the local language for this condition?

\_\_\_\_\_

What is/are the source(s) of water in this school? -

\_\_\_\_\_

Are you familiar with this snail? (picture of *Bulinus* to be shown)

Yes [ ]                      No [ ]

If yes, what is its local name? \_\_\_\_\_

## URINARY SCHISTOSOMIASIS FORM B (INDIVIDUAL QUESTIONNAIRE)

1a. Name: \_\_\_\_\_

b. Age: \_\_\_\_\_ c. Sex: \_\_\_\_\_

2a. Source(s) of water supply

(i) Bore hole

(ii) Dam

(iii) Lakes

(iv) Ponds

(v) River

(vi) Streams

(vii) Well

(viii) Others (Specify) \_\_\_\_\_

2b. Purpose of usage: i. Open water \_\_\_\_\_

ii. Closed water \_\_\_\_\_

2c. How often do you fetch water from the

**open** source(s) per: (i) day

(ii) week

(iii) month

2d. Distance of open water sources:

(i) 100m

(ii) Above 100m

3a. Have you swam before? Yes  No

3b. Visiting times per: i. Week  ii. Month

3c. Played in a shallow river/pond before?

Yes  No

3d. History of: Irrigation  Fishing

3e. History of itching sensation after water

contact (3a -3d) Yes  No

3f. If yes, how many days? \_\_\_\_\_

4. Have you seen this type of snail (picture of

*Bulinus globosus* presented) before?

Yes  No

5a. Symptoms experienced in the last two

weeks (abdominal pain, blood in urine, pain while urinating, diarrhea, coughing, headache, fever & itching) Yes  No

5b. Diseases experienced in the last two weeks

(abdominal problem, Diarrhoea, helminthiasis, malaria, respiratory infections, schistosomiasis, & skin diseases) Yes  No

6. If yes (blood in urine), how have you been treating it?

a. Hospital

b. Herbalist

c. No treatment

7. What is your impression about bloody urine?

a. Normal thing

b. Spiritual forces

c. Sign of sickness

8a. What are the occupations of your parents?

(i) Father a. WCJ  b. Farming c. OBCJ

(ii) Mother a. WCJ  b. Farming c. OBCJ

House wife

8b. Parental(F,M) level of education:

(i) Illiterate

(ii) Primary

(iii) Secondary

(iv) Tertiary

8c. How long have you been in this

town? \_\_\_\_\_

9a. Have you taken praziquantel before?

Yes  No

(At this point, the interviewer will show the drug to the respondent to identify).

(i) If yes, how long ago? \_\_\_\_\_

(ii) If no, why? \_\_\_\_\_

b. History of Severe Adverse Reactions

(SARs). Yes  No

c. If yes, what form was it?

(i) Nausea or vomiting

(ii) Fainting

(iii) General feeling of discomfort

(iv) Skin rash, hives, or itching

(v) Dizziness

(vi) Increased sweating

(vii) Stomach pain

(viii) Muscle pains or stiffness

(ix) Others

(Specify) \_\_\_\_\_.
